# Supplementary material for: Innate Immunity and Sex: Distinct Inflammatory Profiles Associated with Murine Pain in Acute Synovitis
Source: MDPI journal article supplement (doi:10.3390/cells12141913), 2023-07-22
Supplement: s1 [file s1]

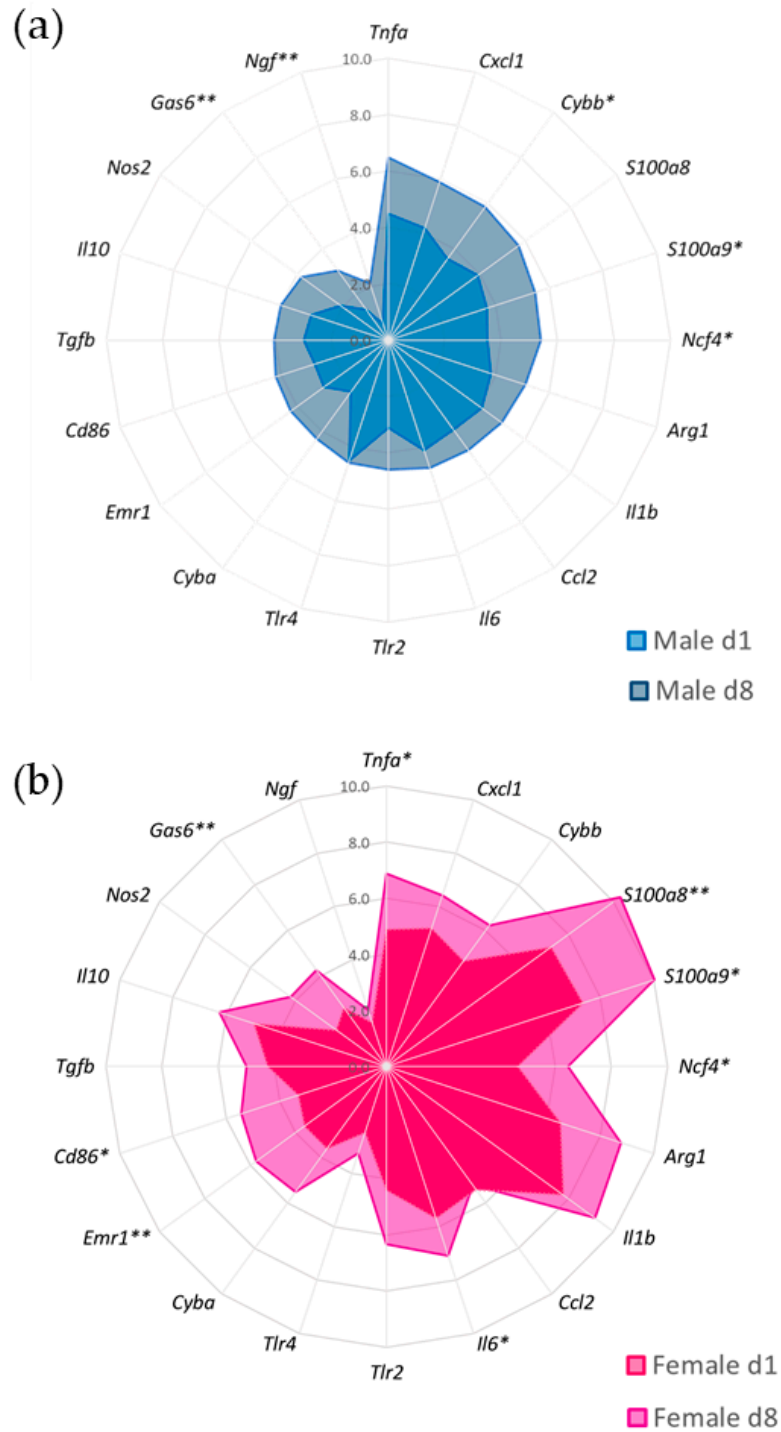

**Figure S1.** Synovial gene expression following SCW intraarticular injections showed more robust inflammatory response during pre-sensitized response. Spider chart based on the synovial genes expressed (ddCt) during acute SCW arthritis based on sex: (a) males day 1/8 and (b) females day1/8. Genes were sorted by stronger gene expression (ddCt) based on the male d8 group. Significance was calculated compared between sexes within first or second SCW response using Two-way ANOVA with Šídák's multiple comparisons test. N=7 males and 8 females per SCW group. \* $p < 0.05$ , \*\* $p \leq 0.01$ , \*\*\* $p \leq 0.001$  and \*\*\*\* $p \leq 0.0001$ .

**Table S1.** Correlation between SCW-induced joint pain and inflammation was weak and non-significant. Specific Spearman coefficient values ( $r_s$ ) and p values between pain behavior parameters - max contact max intensity, print area and single stance on the affected (right) hind limb, static weight bearing (incapacitance)– and arbitrary score of inflammation. Inflammation with proportional association to pain indicated by a positive coefficient;  $r_s$  close to zero indicating no association between parameters; and negative correlations indicated inversely proportional association between inflammation and pain behavior. N=7 males and 8 females per SCW group.

|                           | acute (d1) |         |        |         |
|---------------------------|------------|---------|--------|---------|
|                           | Male       |         | Female |         |
|                           | $r_s$      | p value | $r_s$  | p value |
| max contact max intensity | 0.187      | 0.688   | 0.289  | 0.488   |
| print area                | 0.281      | 0.542   | 0.192  | 0.648   |
| single stance             | 0.056      | 0.905   | 0.192  | 0.648   |
| static weight bearing     | -0.374     | 0.408   | 0.577  | 0.134   |

  

|                           | pre-sensitized (d8) |         |        |         |
|---------------------------|---------------------|---------|--------|---------|
|                           | Male                |         | Female |         |
|                           | $r_s$               | p value | $r_s$  | p value |
| max contact max intensity | 0.116               | 0.805   | 0.589  | 0.124   |
| print area                | 0.231               | 0.618   | 0.430  | 0.288   |
| single stance             | 0.386               | 0.393   | 0.258  | 0.538   |
| static weight bearing     | 0.347               | 0.445   | -0.160 | 0.706   |

**Table S2.** Synovial inflammatory factors abbreviations and full names

| <b>Abbreviation</b>       | <b>Full name</b>                          |
|---------------------------|-------------------------------------------|
| <b>Receptors</b>          |                                           |
| <i>Tlr2</i>               | Toll-like receptor 2                      |
| <i>Tlr4</i>               | Toll-like receptor 4                      |
| <b>Alarmins</b>           |                                           |
| <i>S100a8</i>             | S100 calcium-binding protein A8           |
| <i>S100a9</i>             | S100 calcium-binding protein A9           |
| <b>Chemokines</b>         |                                           |
| <i>Ccl2 (MCP-1)</i>       | C-C motif chemokine 2                     |
| <i>Cxcl1 (KC)</i>         | C-x-C motif chemokine ligand 1            |
| <b>Cytokines</b>          |                                           |
| <i>Il1b</i>               | Interleukin-1 beta                        |
| <i>Tnfa</i>               | Tumor necrosis factor alfa                |
| <i>Il6</i>                | Interleukin-6                             |
| <i>Il10</i>               | Interleukin-10                            |
| <b>Redox signaling</b>    |                                           |
| <i>Cyba</i>               | Cytochrome b-245, alpha polypeptide       |
| <i>Cybb (NOX2)</i>        | Cytochrome b-245, beta polypeptide        |
| <i>Ncf4</i>               | Neutrophil cytosolic factor 4             |
| <i>Nos2</i>               | Nitric oxide synthase, inducible          |
| <b>Neurotropic factor</b> |                                           |
| <i>Ngf</i>                | Nerve growth factor                       |
| <b>Immune cells</b>       |                                           |
| <i>Emr1 (F4/80)</i>       | EGF module-containing mucin-like receptor |
| <i>Cd86</i>               | Cluster of Differentiation 86             |
| <b>Pro-resolution</b>     |                                           |
| <i>Gas6</i>               | Growth arrest-specific protein 6          |

**Table S3** Correlation of synovial inflammatory factors to pain behavior exhibited different profiles between sexes. Specific Spearman coefficient values ( $r_s$ ) and p values between weight bearing asymmetry and synovial genes expressed during acute SCW arthritis. Genes were sorted by stronger proportional association with pain based on the male d8 group. Inflammatory genes with proportional association to pain are indicated by a positive coefficient;  $r_s = 0$ , representing no association between parameters; while negative correlations indicate inversely proportional association between synovium gene expression and pain behavior. \* $p < 0.05$  and \*\* $p < 0.01$ . N=7 males and 8 females per SCW group.

| Male d1       |        |         | Female d1           |        |         |
|---------------|--------|---------|---------------------|--------|---------|
| Gene          | rs     | p value | Gene                | rs     | p value |
| <i>Gas6</i>   | -0.714 | 0.071   | <i>Gas6</i>         | -0.119 | 0.779   |
| <i>Cyba</i>   | 0.250  | 0.589   | <i>Cyba</i>         | 0.452  | 0.260   |
| <i>Il6</i>    | 0.464  | 0.294   | <i>Il6</i>          | -0.381 | 0.352   |
| <i>Cd86</i>   | -0.143 | 0.760   | <i>Cd86</i>         | 0.144  | 0.734   |
| <i>Cxcl1</i>  | 0.393  | 0.383   | <i>Cxcl1</i>        | -0.120 | 0.778   |
| <i>Ngf</i>    | 0.429  | 0.337   | <i>Ngf</i>          | 0.000  | 1.000   |
| <i>S100a8</i> | -0.143 | 0.760   | <i>S100a8</i>       | 0.405  | 0.320   |
| <i>S100a9</i> | -0.250 | 0.250   | <i>S100a9</i>       | 0.491  | 0.217   |
| <i>Tlr2</i>   | -0.179 | 0.702   | <i>Tlr2</i>         | 0.095  | 0.823   |
| <i>Arg1</i>   | -0.607 | 0.607   | <i>Arg1</i>         | 0.143  | 0.736   |
| <i>Cybb</i>   | -0.357 | 0.432   | <b><i>Cybb</i>*</b> | 0.762  | 0.028   |
| <i>Emr1</i>   | -0.143 | 0.760   | <i>Emr1</i>         | 0.238  | 0.570   |
| <i>Il10</i>   | 0.179  | 0.702   | <i>Il10</i>         | 0.024  | 0.955   |
| <i>Ncf4</i>   | -0.607 | 0.607   | <i>Ncf4</i>         | 0.683  | 0.062   |
| <i>Ccl2</i>   | -0.250 | 0.589   | <i>Ccl2</i>         | 0.143  | 0.736   |
| <i>Tnfa</i>   | -0.429 | 0.337   | <i>Tnfa</i>         | 0.252  | 0.548   |
| <i>Tlr4</i>   | 0.071  | 0.879   | <i>Tlr4</i>         | 0.381  | 0.352   |
| <i>Il1b</i>   | -0.393 | 0.383   | <i>Il1b</i>         | 0.214  | 0.610   |
| <i>Nos2</i>   | -0.714 | 0.071   | <i>Nos2</i>         | -0.643 | 0.086   |

**Male d8**

**Female d8**

| Gene          | rs    | p value |
|---------------|-------|---------|
| <b>Gas6**</b> | 0.929 | 0.003   |
| <b>Cyba*</b>  | 0.857 | 0.014   |
| <b>Il6*</b>   | 0.821 | 0.023   |
| <i>Cd86</i>   | 0.750 | 0.052   |
| <i>Cxcl1</i>  | 0.750 | 0.052   |
| <i>Ngf</i>    | 0.679 | 0.094   |
| <i>S100a8</i> | 0.679 | 0.094   |
| <i>S100a9</i> | 0.679 | 0.094   |
| <i>Tlr2</i>   | 0.679 | 0.094   |
| <i>Arg1</i>   | 0.607 | 0.148   |
| <i>Cybb</i>   | 0.607 | 0.148   |
| <i>Emr1</i>   | 0.571 | 0.180   |
| <i>Il10</i>   | 0.571 | 0.180   |
| <i>Ncf4</i>   | 0.571 | 0.180   |
| <i>Ccl2</i>   | 0.464 | 0.294   |
| <i>Tnfa</i>   | 0.393 | 0.383   |
| <i>Tlr4</i>   | 0.321 | 0.482   |
| <i>Il1b</i>   | 0.179 | 0.702   |
| <i>Nos2</i>   | 0.143 | 0.760   |

| Gene          | rs     | p value |
|---------------|--------|---------|
| <i>Gas6</i>   | 0.071  | 0.879   |
| <i>Cyba</i>   | 0.000  | 1.000   |
| <i>Il6</i>    | 0.310  | 0.456   |
| <i>Cd86</i>   | -0.048 | 0.911   |
| <i>Cxcl1</i>  | 0.333  | 0.420   |
| <i>Ngf</i>    | -0.024 | 0.955   |
| <i>S100a8</i> | 0.310  | 0.456   |
| <i>S100a9</i> | 0.286  | 0.493   |
| <i>Tlr2</i>   | 0.429  | 0.289   |
| <i>Arg1</i>   | 0.381  | 0.352   |
| <i>Cybb</i>   | 0.310  | 0.456   |
| <i>Emr1</i>   | 0.476  | 0.233   |
| <i>Il10</i>   | 0.143  | 0.760   |
| <i>Ncf4</i>   | 0.357  | 0.385   |
| <i>Ccl2</i>   | 0.262  | 0.531   |
| <i>Tnfa</i>   | 0.575  | 0.136   |
| <i>Tlr4</i>   | 0.536  | 0.215   |
| <i>Il1b</i>   | 0.429  | 0.289   |
| <b>Nos2*</b>  | 0.738  | 0.037   |
